# Supplementary material
Source: MDPI journal article supplement (https://www.mdpi.com/2075-4701/11/6/968)
Supplement: s1 [file s1]

Supplemental information for “High temperature elastic properties of yttrium doped barium zirconate”

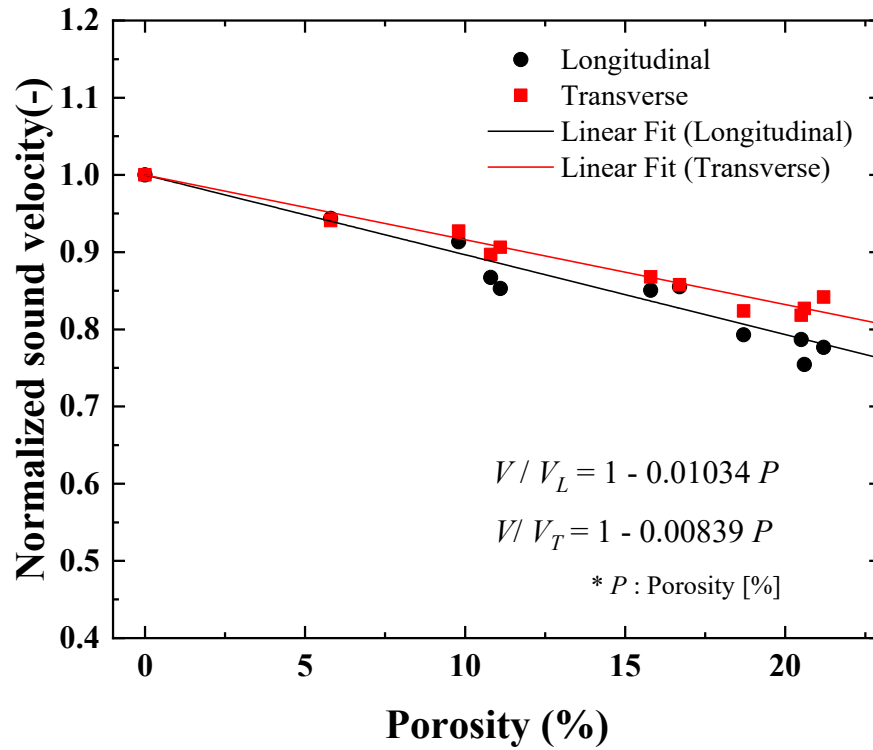

**Figure S1.** Dependence of the sound velocity on the porosity of 8YSZ, determined experimentally. Specifically, 8YSZ samples with a porosity of 0–24% were sintered from 1200–1600 °C. The 2-probe method was used to perform the measurements. The velocities of longitudinal and transverse sound are indicated by black circles and red squares, respectively. The sound velocities were normalized by those when porosity ( $P$ ) is zero.
